# Supplementary material for: Quantitative proteomic analysis of serum-purified exosomes identifies putative pre-eclampsia-associated biomarkers
Source: PubMed Central journal article supplement (PMC8903615; doi:10.1186/s12014-022-09342-4), 2022-02-10
Supplement: 12014_2022_9342_MOESM1_ESM.pdf [file 12014_2022_9342_MOESM1_ESM.pdf]

## A) Standard sample preparation \*

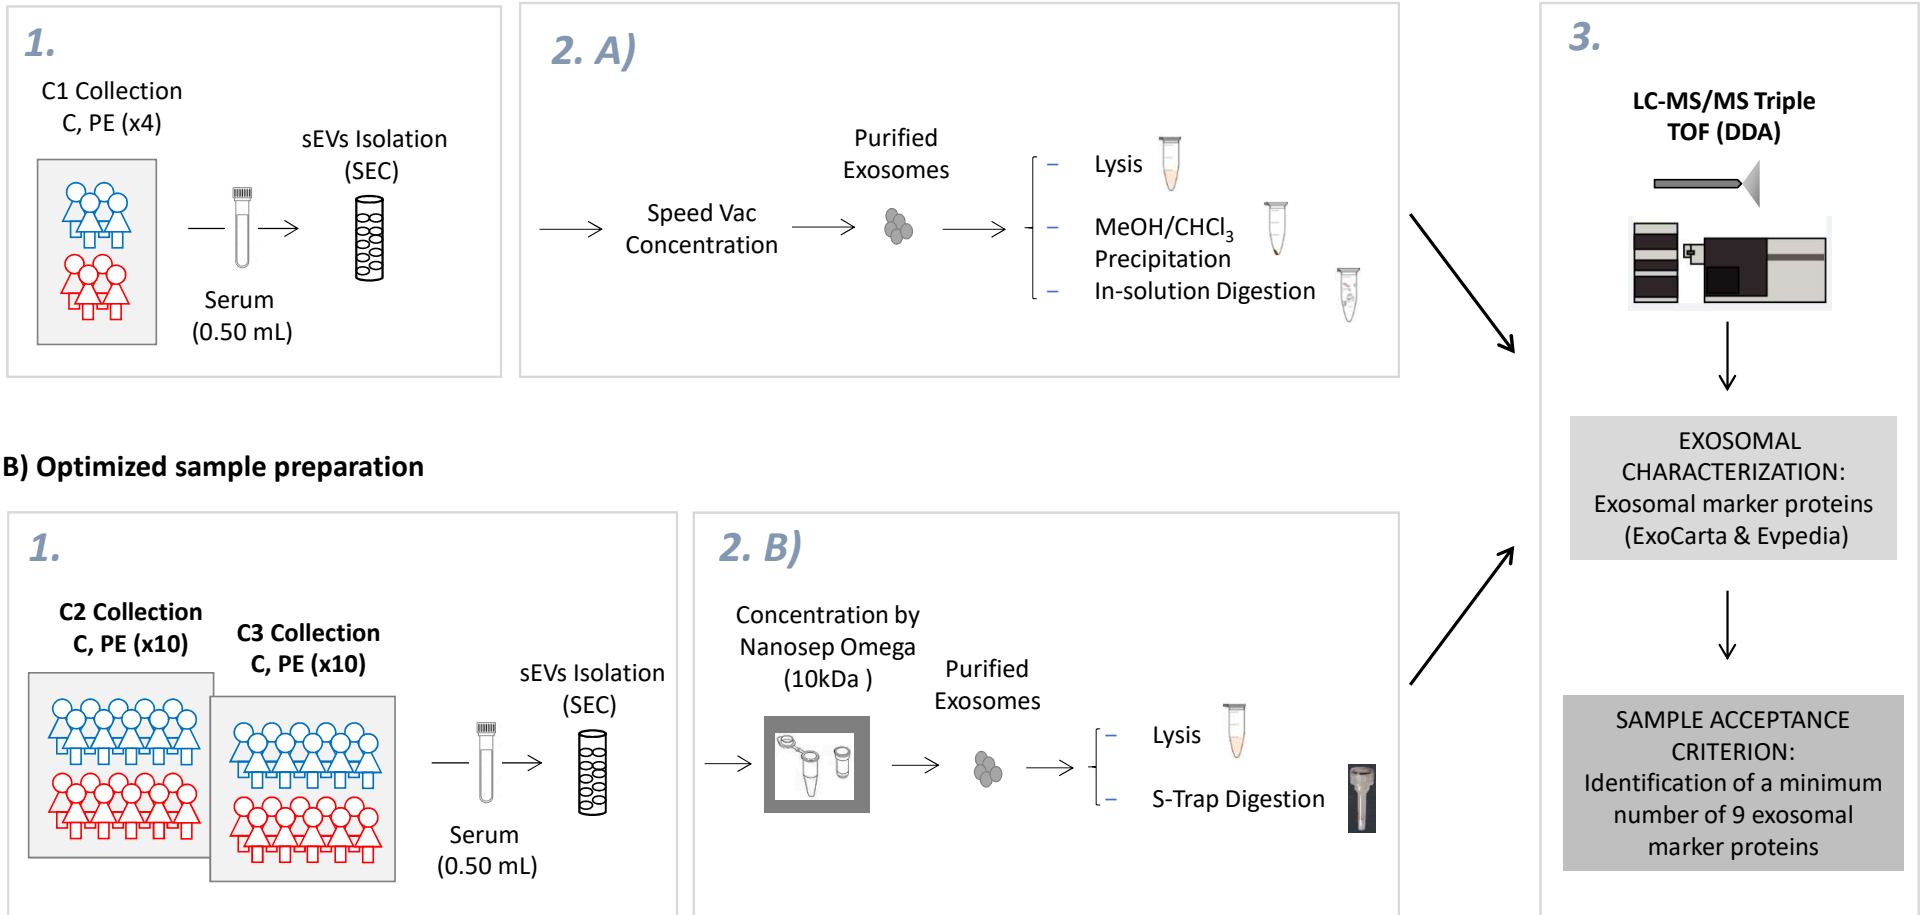

## B) Optimized sample preparation

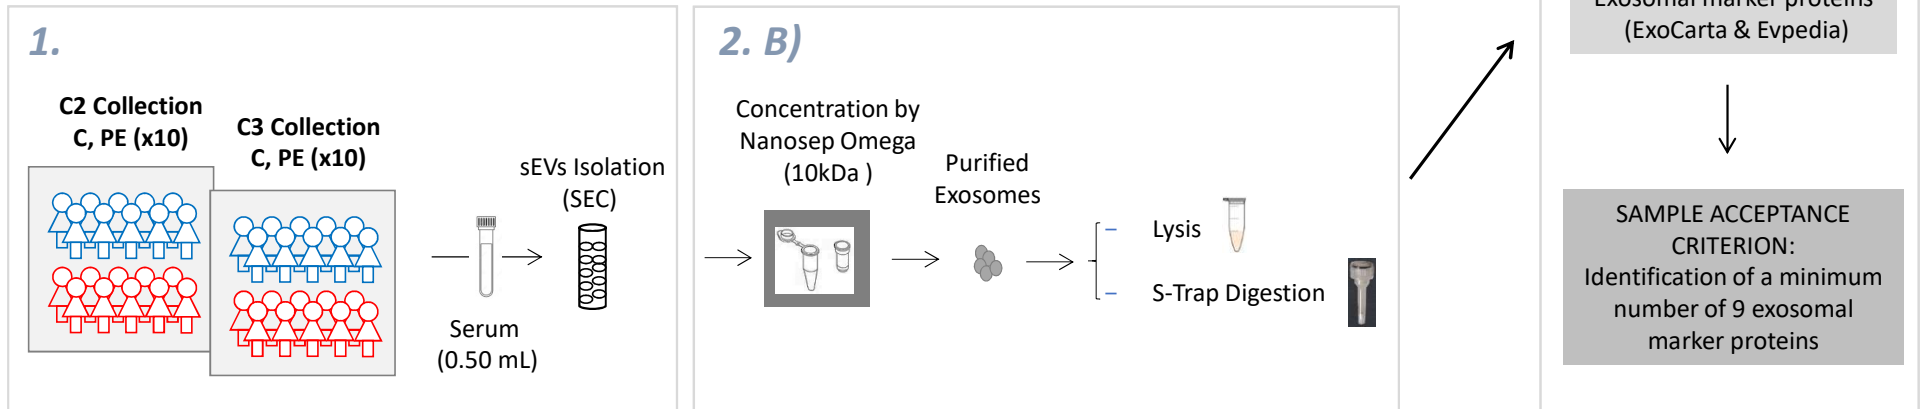

\* C4 collection (11 control and 11 preeclampsia samples), only used for PZP validation by MRM, also followed the standard sample preparation
