# Supplementary material for: Quantitative proteomic analysis of serum-purified exosomes identifies putative pre-eclampsia-associated biomarkers
Source: PubMed Central journal article supplement (PMC8903615; doi:10.1186/s12014-022-09342-4), 2022-02-10

**A**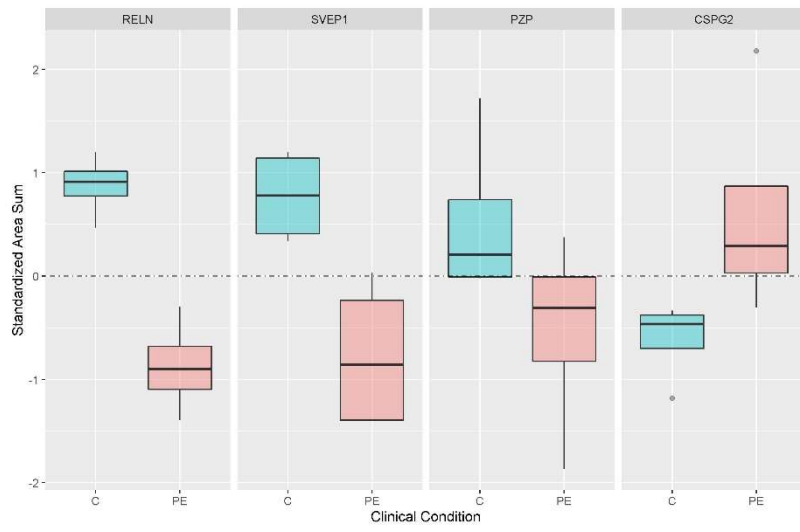**B**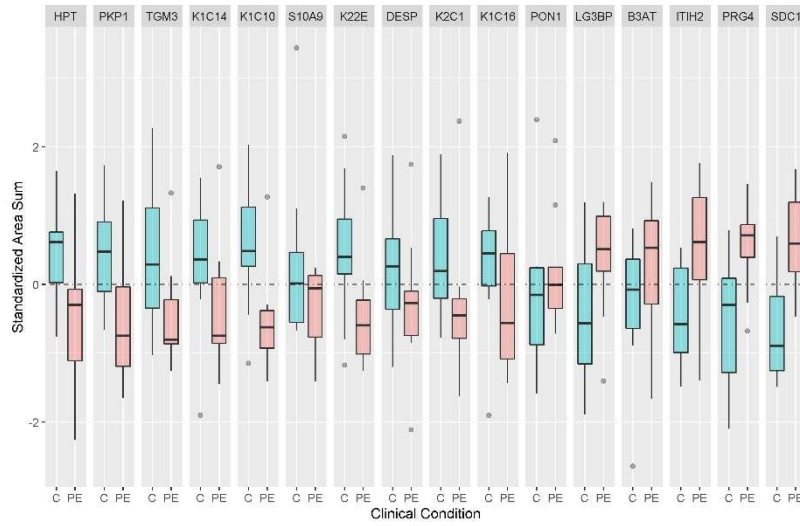**C**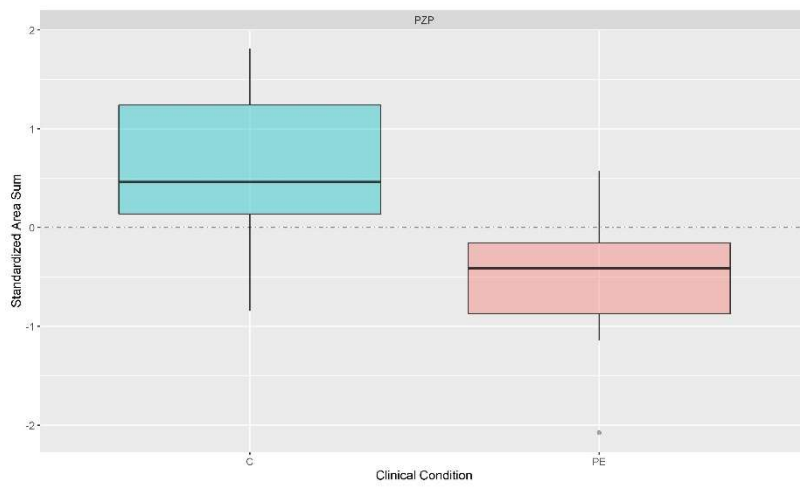

Supplement: 12014_2022_9342_MOESM2_ESM.pdf [file 12014_2022_9342_MOESM2_ESM.pdf]
